# Supplementary material for: Identification of 10 differentially expressed genes involved in the tumorigenesis of cervical cancer via next-generation sequencing
Source: PeerJ journal article supplement (doi:10.7717/peerj.18157), 2024-10-02
Supplement: MIQEchecklist.xls [file MIQEchecklist.xls]

## Sheet: Sheet1
ITEM TO CHECK	IMPORTANCE	CHECKLIST	Explanation
EXPERIMENTAL DESIGN
Definition of experimental and control groups	E	ü	line95 (numbers of samples used in RT-qPCR) and line 162 (experimental group: cervical cancer tissue; control group: paired adjacent normal cervical tissue)
Number within each group	E	ü	line95 (15 in each group)
Assay carried out by core lab or investigator's lab?	D	ü	line182 (investigator’s lab)
Acknowledgement of authors' contributions	D	ü	line695
SAMPLE
Description	E	ü	line162-163
Volume/mass of sample processed	D	ü	line162 (20-30mg for each sample in RNA extraction)
Microdissection or macrodissection	E	ü	line163 (macrodissection)
Processing procedure	E	ü	line97
If frozen - how and how quickly?	E	ü	line97 (storaged at-80℃)
If fixed - with what, how quickly?	E	ü	line97 (without any additive)
Sample storage conditions and duration (especially for FFPE samples)	E	ü	line97 and 164. (Samples were moved to refrigerator at -80℃ immediately and were long-term storaged. RNA was extracted within 1 week.)
NUCLEIC ACID EXTRACTION
Procedure and/or instrumentation	E	ü	line163
Name of kit and details of any modifications	E	ü	line163 (total RNA rapid extraction kit，BIOMAN)
Source of additional reagents used	D	û	not applicable
Details of DNase or RNAse treatment	E	ü	line164 (All the equipments were purified with DEPC water. RNase free water was used for the dilution of RNA. We used the adsorption column in the kit to remove DNA and purify RNA.)
Contamination assessment (DNA or RNA)	E	ü	line166 (We assessed the quality of RNA according to the A260/A280 and A260/A230 value of each sample.)
Nucleic acid quantification	E	ü	line167-168
Instrument and method	E	ü	line167 (Thermo scientific multiskan skyhigh)
Purity (A260/A280)	D	ü	line167 and 168 (All the A260/A280 values of RNA samples were between 1.8 and 2.0.)
Yield	D	û
RNA integrity method/instrument	E	û
RIN/RQI or Cq of 3' and 5' transcripts	E	û
Electrophoresis traces	D	û
Inhibition testing (Cq dilutions, spike or other)	E	û
REVERSE TRANSCRIPTION
Complete reaction conditions	E	ü	line 168-171
Amount of RNA and reaction volume	E	ü	line168 and 170. (The amount of RNA was 200ng and the reaction volume was 20ul.)
Priming oligonucleotide (if using GSP) and concentration	E	ü	line169. (The concentration of Random Primer(N9) was 0.1ug/ul.)
Reverse transcriptase and concentration	E	ü	line170 (We used the TransScript RT/RI Enzyme Mix in the kit and the volume is 1ul. The concentration was not shown in the specification of the kit.)
Temperature and time	E	ü	line171 (25℃ 10min; 42℃ 15min; 85℃ 5s)
Manufacturer of reagents and catalogue numbers	D	ü	line171 (catalogue number: AT311)
Cqs with and without RT	D*	û
Storage conditions of cDNA	D	ü	line172 (cDNA was stored at -20℃ and was used for qPCR within 1 week.)
qPCR TARGET INFORMATION
If multiplex, efficiency and LOD of each assay.	E	û	not applicable
Sequence accession number	E	ü	line183 ( in Table S1) (Sequence accession number: APOD(NM_001647); MASP1(NM_001879); ACKR1(NM_001122951); C1QTNF7(NM_001135170); SFRP4(NM_003014); HSPB6(NM_144617); GSTM5(NM_000851); IGFBP6(NM_002178); F10(NM_000504); DCN(NM_133506); GAPDH(NM_001256799))
Location of amplicon	D	ü	line183 ( in Table S1) (Location of amplicon: APOD-F(60-82); APOD-R(253-233); MASP1-F(60-82); MASP1-R(178-158); ACKR1-F(591-611); ACKR1-R(750-730); C1QTNF7-F(328-348); C1QTNF7-R(469-450); SFRP4-F(465-486); SFRP4-R(576-555); HSPB6-F(230-250); HSPB6-R(278-258); GSTM5-F(224-242); GSTM5-R(334-313); IGFBP6-F(539-559); IGFBP6-R(655-637); F10-F(60-80); F10-R(199-179); DCN-F(1-22); DCN-R(135-116); GAPDH-…
Amplicon length	E	ü	line183 ( in Table S1) (Amplicon length: APOD(194); MASP1(119); ACKR1(160); C1QTNF7(142); SFRP4(112); HSPB6(49); GSTM5(111); IGFBP6(117); F10(140); DCN(135); GAPDH(197))
In silico specificity screen (BLAST, etc)	E	ü	line184 (We examined the primer sequences in BLAST, and nearly all the primer sequences were specific except for GSTM5. The products of our GSTM5 templates included GSTM5 mRNA and its transcript variant X1 and GSTM3 transcript variant 1 (this product length was 3079bp).)
Pseudogenes, retropseudogenes or other homologs?	D	û
Sequence alignment	D	û
Secondary structure analysis of amplicon	D	û
Location of each primer by exon or intron (if applicable)	E	û
What splice variants are targeted?	E	û
qPCR OLIGONUCLEOTIDES
Primer sequences	E	ü	line184 ( in Table S1)
RTPrimerDB Identification Number	D	û
Probe sequences	D**	û
Location and identity of any modifications	E	û	not applicable
Manufacturer of oligonucleotides	D	ü	line185 (Sangon, Shanghai, China)
Purification method	D	û
qPCR PROTOCOL
Complete reaction conditions	E	ü	line 173-180
Reaction volume and amount of cDNA/DNA	E	ü	line179 (The reaction volume was 20ul and the volume of cDNA was 1ul.)
Primer, (probe), Mg++ and dNTP concentrations	E	ü	line179 (The forward and reverse primer concentration were 10uM. PerfectStart Green qPCR Supermix contained other conponents and their concentrations were not mentioned in the specification of the kit.)
Polymerase identity and concentration	E	ü	line173 (PerfectStart Green qPCR Supermix contained this conponent and the concentration were not mentioned in the specification of the kit.)
Buffer/kit identity and manufacturer	E	ü	line173 (catalogue number: AQ601)
Exact chemical constitution of the buffer	D	ü	line173 (PerfectStart Green qPCR Supermix contained this conponent and the concentration were not mentioned in the specification of the kit.)
Additives (SYBR Green I, DMSO, etc.)	E	ü	line180 (SYBR Green I)
Manufacturer of plates/tubes and catalog number	D	ü	line174 (Axygen (PCR-0208-C))
Complete thermocycling parameters	E	ü	line177-178
Reaction setup (manual/robotic)	D	ü	line176 (manual)
Manufacturer of qPCR instrument	E	ü	line174 (QuantStudio 3 Real-Time PCR System (ABI, CA, USA))
qPCR VALIDATION
Evidence of optimisation (from gradients)	D	û
Specificity (gel, sequence, melt, or digest)	E	ü	line183 (Each melt curve has only one peak.)
For SYBR Green I, Cq of the NTC	E	û	not applicable
Standard curves with slope and y-intercept	E	û	not applicable
PCR efficiency calculated from slope	E	û	not applicable
Confidence interval for PCR efficiency or standard error	D	û
r2 of standard curve	E	û	not applicable
Linear dynamic range	E	û	not applicable
Cq variation at lower limit	E	û	not applicable
Confidence intervals throughout range	D	û
Evidence for limit of detection	E	û	not applicable
If multiplex, efficiency and LOD of each assay.	E	û	not applicable
DATA ANALYSIS
qPCR analysis program (source, version)	E	ü	line175 (QuantStudio Design & Analysis Software)
Cq method determination	E	û
Outlier identification and disposition	E	ü	line183 (According to the Ct value, there was little outlier. )
Results of NTCs	E	û	not applicable
Justification of number and choice of reference genes	E	ü	line180
Description of normalisation method	E	ü	line181 (2^-ΔΔCt)
Number and concordance of biological replicates	D	ü	line95 (15 cases mean 15 biological replicates)
Number and stage (RT or qPCR) of technical replicates	E	ü	line182. RT and qPCR both have 3 technical replicates.
Repeatability (intra-assay variation)	E	ü	line182 (We got well repeatability.)
Reproducibility (inter-assay variation, %CV)	D	û
Power analysis	D	û
Statistical methods for result significance	E	ü	line198 (student’s t test)
Software (source, version)	E	ü	line198 (Graphpad Prism 9)
Cq or raw data submission using RDML	D	û
Table 1. MIQE checklist for authors, reviewers and editors. All essential information (E) must be submitted with the manuscript. Desirable
information (D) should be submitted if available. If using primers obtained from RTPrimerDB, information on qPCR target, oligonucleotides,
protocols and validation is available from that source.
*: Assessing the absence of DNA using a no RT assay is essential when first extracting RNA. Once the sample has been validated as
RDNA-free, inclusion of a no-RT control is desirable, but no longer essential.
**: Disclosure of the probe sequence is highly desirable and strongly encouraged. However, since not all commercial pre-designed assay
vendors provide this information, it cannot be an essential requirement. Use of such assays is advised against.
