# Supplementary material for: Identification of 10 differentially expressed genes involved in the tumorigenesis of cervical cancer via next-generation sequencing
Source: PeerJ journal article supplement (doi:10.7717/peerj.18157), 2024-10-02
Supplement: Table_S1.docx [file Table_S1.docx]

**Supplemental Table S1**

**Table S1. Targeted gene information and specific primer sequences of top 10 DEGs**

| **Gene** | **Forward primer sequence** | **Location of amplicon (Forward)** | **Reverse primer sequence** | **Location of amplicon (Reverse)** | **Amplicon length** | **Sequence accession number** |
| --- | --- | --- | --- | --- | --- | --- |
| *GAPDH* | 5’- GGAGCGAGATCCCTCCAAAAT-3’ | 108-128 | 5’-GGCTGTTGTCATACTTCTCATGG-3’ | 304-282 | 197 | NM_001256799 |
| *APOD* | 5’- ACAAGCATTTCATCTTGGGAAGT-3’ | 60-82 | 5’- CATCAGCTCTCAACTCCTGGT-3’ | 253-233 | 194 | NM_001647 |
| *MASP1* | 5’- CACCGTGGAGCTAAACAATATGT-3’ | 60-82 | 5’- GCTTGATCCGAAACCCATCTG-3’ | 178-158 | 119 | NM_001879 |
| *ACKR1* | 5’- CACCCTGATATACAGCACGGA-3’ | 591-611 | 5’- GGCCCACAGGATATTCATCCA-3’ | 750-730 | 160 | NM_001122951 |
| *C1QTNF7* | 5’- AAAGGACCCATAGGACCAGAG-3’ | 328-348 | 5’- AGGCGGATTTGAGCACGATG-3’ | 469-450 | 142 | NM_001135170 |
| *SFRP4* | 5’- CACACCAGACATGATGGTACAG-3’ | 465-486 | 5’- GCTGAGATACGTTGCCAAAGTT-3’ | 576-555 | 112 | NM_003014 |
| *HSPB6* | 5’- TGCTAGACGTGAAGCACTTCT-3’ | 230-250 | 5’- ACCACCTTGACAGCAATTTCC-3’ | 278-258 | 49 | NM_144617 |
| *GSTM5* | 5’- CCATCCTGCGCTACATTGC-3’ | 224-242 | 5’- CCAGCTCCATGTGGTTATCCAT-3’ | 334-313 | 111 | NM_000851 |
| *IGFBP6* | 5’- GAGGGGCTCAAACACTCTACG-3’ | 539-559 | 5’- CCATCCGATCCACACACCA-3’ | 655-637 | 117 | NM_002178 |
| *F10* | 5’- CGGGGAAAGTCTGTTCATCCG-3’ | 60-80 | 5’- CCTCTTCGTATGAGCAGGTCT-3’ | 199-179 | 140 | NM_000504 |
| *DCN* | 5’- ATGAAGGCCACTATCATCCTCC-3’ | 1-22 | 5’- GTCGCGGTCATCAGGAACTT-3’ | 135-116 | 135 | NM_133506 |
